# Supplementary material
Source: PubMed Central journal article supplement (PMC4018907)
Supplement: AEM.04220-13_zam999105364so1.pdf [file AEM.04220-13_zam999105364so1.pdf]

## SUPPORTING INFORMATION

Role of sulfur species as redox partners and electron shuttles for ferrihydrite reduction by  
*Sulfurospirillum deleyianum*

Regina Lohmayer<sup>a</sup>, Andreas Kappler<sup>b</sup>, Tina Lösekann-Behrens<sup>b</sup>, Britta Planer-Friedrich<sup>a#</sup>

Environmental Geochemistry Group, Bayreuth Center for Ecology and Environmental Research  
(BayCEER), University of Bayreuth, Bayreuth, Germany<sup>a</sup>;

Geomicrobiology, Center for Applied Geosciences, University of Tuebingen, Tuebingen,  
Germany<sup>b</sup>

Running Head: Sulfur electron shuttling to ferrihydrite

#Address correspondence to Britta Planer-Friedrich, [b.planer-friedrich@uni-bayreuth.de](mailto:b.planer-friedrich@uni-bayreuth.de)

**Table SI-1** Production of  $S_6^{2-}$  and  $S^0$  from thiosulfate in incubations of *Sulfurospirillum deleyianum* supplied with 2 mM cysteine as sulfur source and reductant, 5 mM acetate as carbon source, and 10 mM formate as electron donor. The LOD (limit of detection) was derived from the smallest integrable peak and came to 0.1  $\mu$ M for  $S_6^{2-}$  and 0.5  $\mu$ M for  $S^0$ .

| [d] | 2 mM thiosulfate,<br>1 % inoculum<br>unfiltered |               | 0.1 mM thiosulfate,<br>1 % inoculum<br>unfiltered |               | 2 mM thiosulfate,<br>1 % inoculum<br>filtered |               | 0.1 mM thiosulfate,<br>1 % inoculum<br>filtered |               |
|-----|-------------------------------------------------|---------------|---------------------------------------------------|---------------|-----------------------------------------------|---------------|-------------------------------------------------|---------------|
|     | $S_6^{2-}$<br>[mM]                              | $S^0$<br>[mM] | $S_6^{2-}$<br>[mM]                                | $S^0$<br>[mM] | $S_6^{2-}$<br>[mM]                            | $S^0$<br>[mM] | $S_6^{2-}$<br>[mM]                              | $S^0$<br>[mM] |
| 0   | < LOD                                           | < LOD         | < LOD                                             | < LOD         | < LOD                                         | < LOD         | < LOD                                           | < LOD         |
| 2   | 0.002                                           | 0.009         | < LOD                                             | < LOD         | < LOD                                         | 0.018         | < LOD                                           | < LOD         |
| 5   | 0.001                                           | 0.002         | < LOD                                             | < LOD         | < LOD                                         | 0.012         | < LOD                                           | < LOD         |
| 7   | 0.012                                           | < LOD         | 0.017                                             | < LOD         | < LOD                                         | 0.006         | < LOD                                           | < LOD         |
| 9   | 0.009                                           | < LOD         | 0.009                                             | < LOD         | < LOD                                         | < LOD         | < LOD                                           | < LOD         |
| 12  | 0.008                                           | < LOD         | 0.007                                             | < LOD         | < LOD                                         | < LOD         | < LOD                                           | < LOD         |
| 15  | 0.009                                           | < LOD         | 0.016                                             | < LOD         | < LOD                                         | < LOD         | < LOD                                           | < LOD         |

**Table SI-2** Fe(II) total production from ferrihydrite in incubations of *Sulfurospirillum deleyianum* supplied with 5 mM acetate as carbon source, and 10 mM formate as electron donor.

Standard deviations are based on three replicates; n.d. means not determined.

| [d]                     |                                        | 0      | 3      | 6      | 9      | 12     | 15     |
|-------------------------|----------------------------------------|--------|--------|--------|--------|--------|--------|
| Fe(II)<br>total<br>[mM] | cysteine 0.1 mM,<br>thiosulfate 0.1 mM | 0.02 ± | 0.91 ± | 1.12 ± | 1.26 ± | 1.79 ± | 1.85 ± |
|                         |                                        | 0.00   | 0.05   | 0.06   | 0.02   | 0.43   | 0.31   |
|                         | cysteine 0.1 mM,<br>cystine 0.1 mM     | 0.02 ± | 0.19 ± | n.d.   | 0.28 ± | n.d.   | 0.30 ± |
|                         |                                        | 0.00   | 0.25   |        | 0.32   |        | 0.23   |

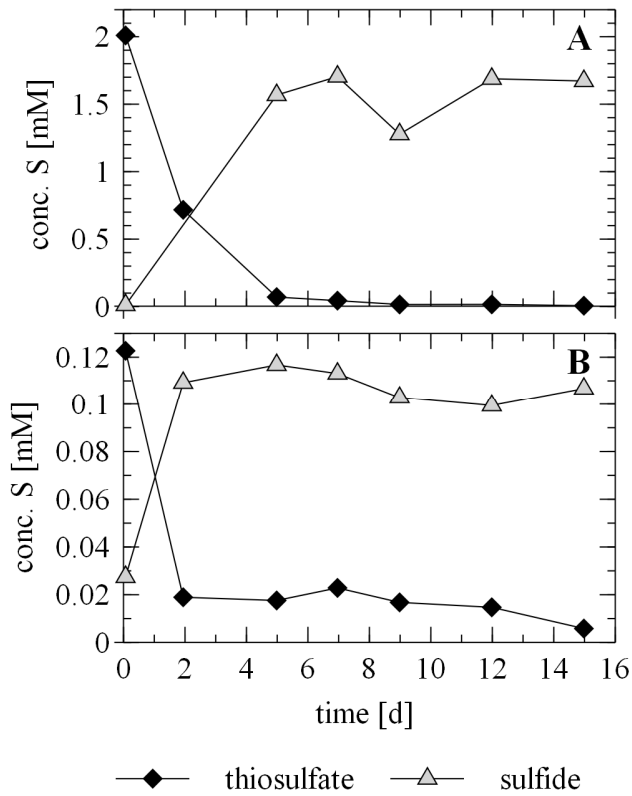

**Fig. SI-1** Production of sulfide from thiosulfate (A: 2.0 mM, B: 0.1 mM) in incubations of *Sulfurospirillum deleyianum* supplied with 2 mM cysteine as sulfur source and reductant, 5 mM acetate as carbon source, and 10 mM formate as electron donor.
